# Supplementary material
Source: publisher figshare collection journal article supplement (https://gsajournals.figshare.com/ndownloader/files/29052306)
Supplement: Supplementary file 1 [file 29052306]

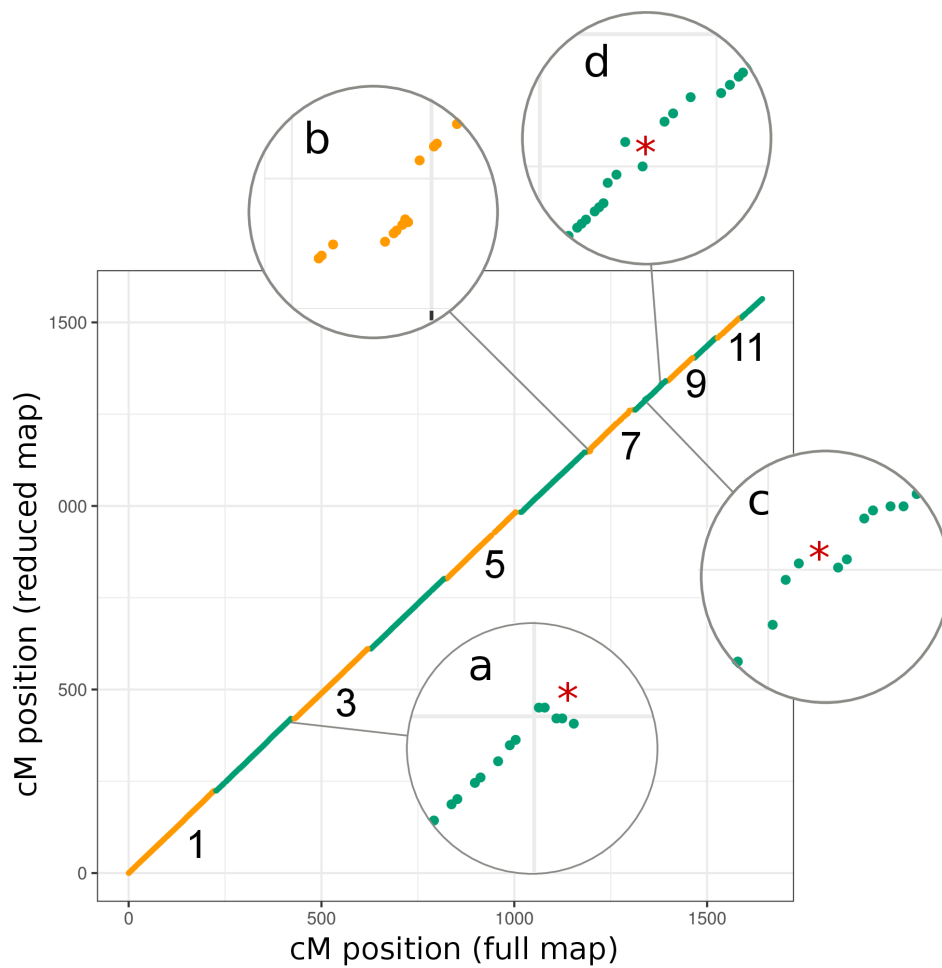

**Figure S8. Map positions in the full versus the reduced map (2022 loci).** LGs have alternating colour and odd-numbered LGs are labelled. Four insets highlight the most pronounced discrepancies. Asterisks indicate a reversal of locus order. (a) Five loci at the terminus of LG2 are involved in a reversal of order, with the largest displacement (2.52 cM) overall. (b) A 5.58 cM gap in the full map is replaced by a 6.52 cM gap in the reduced map a bit further along LG7. (c) and (d) Two cases in which two neighbouring loci have reversed order in the reduced map on LG8.
